# Supplementary material for: Chimpanzees and bonobos differ in intrinsic motivation for tool use
Source: Springer Nature journal article supplement (doi:10.1038/srep11356), 2015-06-16
Supplement: 41598_2015_BFsrep11356_MOESM1_ESM.pdf [file 41598_2015_BFsrep11356_MOESM1_ESM.pdf]

## SUPPLEMENTARY INFORMATION

### **Chimpanzees and bonobos differ in intrinsic motivation for tool use**

Kathelijne Koops<sup>a,b\*</sup>, Takeshi Furuichi<sup>c</sup> and Chie Hashimoto<sup>c</sup>

*<sup>a</sup>Anthropological Institute and Museum, University of Zurich, Winterthurerstrasse  
190, 8057 Zürich, Switzerland*

*<sup>b</sup>Department of Archaeology & Anthropology, University of Cambridge, Pembroke  
Street, CB2 3QG Cambridge, United Kingdom*

*<sup>c</sup>Primate Research Institute, Kyoto University, Aichi 484-8506, Japan*

#### **\*Corresponding Author:**

Kathelijne Koops

Anthropological Institute & Museum

University of Zurich

Winterthurerstrasse 190

8057 Zürich

Switzerland

Email: [kathelijne.koops@uzh.ch](mailto:kathelijne.koops@uzh.ch)

Phone: +41 (0) 78 874 35 02; +44 (0) 77 943 31 849

**Supplementary Table 1.** Focal individuals (name, sex, age), name of mother and total observation time per individual at Kalinzu

| <i>Name</i> | <i>Sex</i> | <i>Age (yrs)</i> | <i>Mother</i> | <i>Observation time (hrs)</i> |
|-------------|------------|------------------|---------------|-------------------------------|
| Mugisha     | Male       | 0.7              | Mitsu         | 4.7                           |
| Hayato      | Male       | 0.9              | Haro          | 9.7                           |
| Eta         | Male       | 1.3              | Esunzu        | 9.5                           |
| Ayu         | Female     | 2.6              | Asa           | 5.4                           |
| Picasso     | Male       | 2.6              | Pinka         | 9.0                           |
| Iyo         | Female     | 2.9              | Ida           | 9.2                           |
| Max         | Male       | 3.5              | Mami          | 6.0                           |
| Gale        | Female     | 4.0              | Gai           | 9.7                           |
| Haruka      | Female     | 4.8              | Haro          | 9.4                           |
| Taro        | Male       | ~5.3             | Tae           | 10.0                          |
| Milk        | Male       | 6.1              | Mitsu         | 3.4                           |
| Ua          | Female     | 6.1              | Ume           | 5.8                           |
| Piriko      | Female     | ~6.8             | Pinka         | 7.4                           |
| Iku         | Female     | 7.1              | Ida           | 10.0                          |

**Supplementary Table 2.** Focal individuals (name, sex, age), name of mother and total observation time per individual at Wamba

| <i>Name</i> | <i>Group</i> | <i>Sex</i> | <i>Age</i><br>( <i>yrs</i> ) | <i>Mother</i> | <i>Observation time</i><br>( <i>hrs</i> ) |
|-------------|--------------|------------|------------------------------|---------------|-------------------------------------------|
| Kale        | P            | Male       | 1.2                          | Kabo          | 12.0                                      |
| Isao        | P            | Male       | 1.3                          | Ichi          | 12.7                                      |
| Hideo       | P            | Male       | 2.3                          | Hide          | 12.5                                      |
| Pipi        | P            | Female     | 4.5                          | Pao           | 12.3                                      |
| Ichiko      | P            | Female     | 4.5                          | Ichi          | 13.2                                      |
| Hideko      | P            | Female     | 7.0                          | Hide          | 12.3                                      |
| Kaboko      | P            | Female     | 7.0                          | Kabo          | 12.2                                      |
| Seko        | E1           | Male       | 1.4                          | Sala          | 13.2                                      |
| Jolie       | E1           | Female     | 1.4                          | Jacky         | 14.2                                      |
| Fua         | E1           | Female     | 2.4                          | Fuku          | 13.5                                      |
| Otoko       | E1           | Female     | 2.4                          | Otomi         | 13.5                                      |
| Yume        | E1           | Female     | 3.6                          | Yuke          | 13.9                                      |
| Hachiro     | E1           | Male       | 3.8                          | Hoshi         | 13.5                                      |
| Kyota       | E1           | Male       | 3.8                          | Kiku          | 14.5                                      |
| Natsuko     | E1           | Female     | 4.0                          | Nao           | 13.6                                      |
| Joe         | E1           | Male       | 6.8                          | Jacky         | 13.5                                      |
